# Supplementary material for: Role of the Synthetic B1 Vitamin Sulbutiamine on Health
Source: J Nutr Metab. 2020 Apr 20;2020:9349063. doi: 10.1155/2020/9349063 (PMC7210561; doi:10.1155/2020/9349063)
Supplement: Supplementary Materials — Description of sulbutiamine studies and its health applications. [file 9349063.f1.xlsx]

## Sheet: Sulbutiamine studies
	TABLE 1. Sulbutiamine by application.
	Authors; year (Location)	Application	Sample (n)/cell Study model	Duration (days)	Dose	*Human Dose Equivalency	Measurements	Results
	Jonus et al.; 2020 (EUA)	Cancer	Human cancer cell lines HCT 116; U-87 MG; MDA-MB-231. Mice in vivo xenograft tumor model	In vitro: 5 In vivo:12	In vitro: 1-1000μΜ In vivo: 250mg/kg	In vivo: 21mg/kg every second day	1-Cellular proliferation inhibition 2- Apoptosis 3- IC [T] [ThDP] [SBT] 4- PDH activition 5- In vivo tumor growth and volume	1- 31 fold less [SBT] necessary than [T]. 2- 5 fold higher than control. 3- IC [T]=equal to BFT [ThDP]=equal to BFT [SBT]=null. 4-[250μΜ] approximately 8 fold more activation than control. 5- No change in the tumor volume compared to control.
	Loo et al.; 2000 (France)	Depression	Multicenter clinical trial. Double-blind randomized controlled trial	56	600mg/d	600mg/d	Depression associated scale evaluation: MADRS, HAM-A, CGI Psycho-behavioural inhibition assessment: SDC, VAS, ERD.	No improvement observed in the depression scales. Significantly decrease of psycho-behavioural inhibition SDC, VAS and ERD.
	Kang & Majid et al.; 2010 (UK)	Deprived ambient (Glaucoma)	Transformed retinal ganglion cells (RGC-5)	-	1μΜ 10μΜ 50μΜ 100μΜ	-	1- Cell viability 2-ROS production 3-GSH and GST levels/activity - after DE 4- AIF and caspase-3 levels	1- 100 μM decreases apoptotic cells from 22,1% to 15,5%. 2- Dose dependent manner reduce the production of H2O2 and O2. 3- Increase in GSH levels and 2 fold increase in GST activity. 4- Attenuation of AIF and cleaved caspase-3 elevation.
	Majid et al.; 2013 (UK)	Deprived ambient - serum deprived situation (SDS) and Oxidative stress situation. (Glaucoma)	Transformed retinal ganglion cells (RGC-5)	-	10 μM 50μM 100μM	-	1- Cell viability 2- Apoptosis 3- Caspase 3 activity 4- ROS levels 5- GSH , Catalase/ GST, Nrf-2 and HO-1 levels	1- Dose dependent increases (0%;18%; 28%) in SDS 2- Decreases in SDS - 100μM dose 3- Decreases in SDS - 100μM dose 4-Decreases in SDS – 50, 100μM dose 5-Increases in OSS SDS 50,100μM dose
	Kwag & Majid & Kang; 2011 (Korea)	Deprived ambient (Ischemia)	Postnatal rat hippocampal CA1 pyramidal neurons	-	1 μM 10 μM 50 μM	-	1- Cell viability 2- EST 3- NMIR 4-Excitability	1- Significantly reduced apoptosis 2- Dose dependent improvement 3- Dose dependent improvement 4- No difference
	Sambon et al.; 2019 (Belgium)	Deprived ambient (Thiamine-restricted; paraquat and β-amyloid toxicity)	Mouse neuroblastoma cells (Neuro2a)	Restriction 7 days Treatment 6 hours	0.5μM 5μM 25 μM	-	1- [T] 2- [ThDP] 3- Cell viability	1- 10 fold increase compared to T and BFT 2- Faster increases compared to T and BFT 3- Increases cell viability against paraquat and β-amyloid toxicity
	Kiew et al.; 2002 (Malaysia)	Diabetes Polyneurophaty	Adult humans - 55 years m.a. (30). Open-label randomized controlled study	42	400mg/d	400mg/d	1- Blood glucose 2- HbA1 3- Symptom score 4- Signs score 5- NCV 6- CMAP	1- No difference 2- No difference 3- No difference 4- No difference 5- No difference 6- Improvement
	Shah et al.; 2003 (India)	Fatigue (Infection associated)	Adult humans - 38 years m.a. (1772). Prospective commercial observational. Non-randomized, uncontrolled trial	15	400mg/d	400mg/d	1-Asthenic subjective scale of 0-3 2- Well being scale of 0 -10	1- Reductions in patients reporting severe (367 to 11) and moderate (1015 to 94) symptoms. Increase in patients with mild symptoms (390 to 751) 2- Well being scale statement increased from 2.8 to 5.8
	Tiev et al.; 1999 (France)	Fatigue (Infection associated)	Adult humans - 42 years mean age 64%F (326). Double-blind randomized controlled trial	28	400mg/d or 600mg/d	400mg/d or 600mg/d	Multidimensional Fatigue Inventory (MFI)	7 days improvement in the 600mg female group .No persistent effect at 28 days.
	Sevim et al.; 2017 (Turkey)	Fatigue (Multiple Sclerosis)	Adult Humans (26). Retrospective observational cohort	60	400mg/kg/d	-	Fatigue Impact Scale	Reduction on FIS total score and all three subscales assessing physical, cognitive, and psychosocial functioning in patients with concomitantly MS treatment. No improvement in non MS treated patients.
	Levin & Slizkova. 2007 (Russian)	Fatigue (post cranial cerebral trauma)	Adult humans (36). Controlled trial	90	Dosage NS. Control group, use of Piracetam	-	Fatigue symptoms mean scores.	Persistent decrease in headache, difficulty remembering and fatigue in the SBT group (3 months).
	Micheau et al.; 1985 (France)	Memory	Adults BALB/c mice (52)	10	300mg/kg/d	25mg/kg/d	1- Speed of AST 2- Retention test 24h 3- SDHACU	1- No difference observed 2- Improvement in responses(2 fold) 3- 10% increasing in choline uptake
	Bizot et al.; 2005 (France)	Memory	Young Sprague – Dawley Han rats (30)	63	12.5mg/kg/d 25mg/kg/d	2mg/kg/d 4mg/kg/d	1- DNMTS 2- Amnesia effect of dizocilpine 3-Object recognition task	1-No difference between groups 2- 12.5mg/kg gorup reduce the amnesia induced by dizocilpine 3- Both SBT groups increased the object recognition task (memory)
	Ollat et al.; 2007 (France)	Memory (Alzheimer)	Adult humans - 74 years m.a. (83). Multicenter clinical trial. Double-blind randomized control trial	90SBT	Donepezil (D) + placebo (P) group;SBT + D group**	1st month: 400mg/d Remaining: 600mg/d	1-RL/RI 16 2- BVRT, 3- TMT, WAIS-R. 4- d2 test. 5- CDS. 6-Apathy-indifference NPI-Q	1th trimester: D+P group - 14% improvement in the d2 test. SBT +D- 11% time reduction in TMT part A test.2nd trimester: D+P decrease in RL/RI16 and d2 test performance. SBT+D had improvement in RL/RI16, WAIS-R and TMT part B test performance.
	Trovero et al.; 2000 (France)	Neurochemistry	Young Male Sprague-Dawley rats	C: 14A: 1	12.5mg/kg/d (IP)	2mg/kg/d	D1-DA, NMDA, AMPA, kainite and D2-DA receptors binding sitesMonoamine estimations after C,A.	C: +26 and +34% density of D1 binding sites in PFC and ACC, respectively. 5d post C, -36 and -28% density of kainate binding in the CC and the Nac, respectively.A: decreased density of kainate binding sites in PFC and CC. DA,-26% in CC. DOPAC -30% and -34%in the PFC..
	Balzamo & Cacciuttolo; 1982 (France)	Neurochemistry (Vigilance)	Adults Macaca Mulata (6)	10	300mg/kg/d	100mg/kg/d	1-Cortical EEG 2- State of vigilance	1- Increasing in occurrence of fast rhythms; 2- Waking enhancement and a decrease in stage 2 duration with increase in light sleep.
	Garcia-Torres et al.; 2018 (Mexico)	Parasite infection	Enzymatic assay:EiTIM; GlTIM;TcTIM;LmTIM; EcTIM; EhTIM;HsTiM.	-	0,2μM	-	Enzyme inhibition.	Inhibition of EiTIM but not of HsTIM.
	Dmitriev et al.; 2005 (Hungary)	Psychogenic erectile disfunction	Adult humans (22). Uncontrolled trial.	30	-	-	1- IIEF 2- Cavernous arterial blood flow 3-EMG cavernous electric activity	1- IIEF improvement from 17.5 to 24.82- Improvement in 50% of the patients suffering arterial dysfunction 3- Normalized in 36% of the patients
	Bettendorff et al.; 1990 (Belgium)	Thiamine phosphate metabolism	Serum, brain and renal rat tissues	14	52mg/kg/d	8mg/kg/d	[T] [ThMP] [ThDP] [ThTP]	SBT significantly increased [T] and [ThTP] in serum and all tissues.
	Bettendorff et al.; 1994 (Belgium)	Thiamine phosphate metabolism	Young Female Wistar rat brain fractions: H, P1, P2, S3, P3, MY, SI, MI	1	[14C] S (3.5 mg/kg) or [14C] T (3.0 mg/kg)	S (0,6mg/kg) T (0,5mg/kg)	[ThMP] [ThDP] [ThTP]	Sulbutiamine is.preferentially transformed to [ThDP]. No difference in the others parameters.
	[SBT], sulbutiamine concentration; [T], thiamine concentration; [ThDP], thiamine diphosphate concentration; [ThMP], thiamine monophosphate concentration; [ThTP], thiamine triphosphate concentration; A, acute treatment; ACC, anterior cingular cortex; AIF, Apoptose induced factor; AMPA, 2-amino-3-hydroxy-5-methyl-isoxazole-4-propionic acid; AST, acquisition single test; BFT, Benfotiamine; BVRT, Ben…
	*Human dose equivalency based on Nair 2016.
	**Donepezil (D) + placebo (P): 1th month 5mg/d D. 2nd and 3rd months 10mg/d D. 4th to 6th months 10mg/d D + P. Group SBT 1th month 400mg/d SBT. 2nd and 3rd months 600mg/d SBT. 4th month 600mg/d SBT + 5mg/day D. 5th and 6th months 600mg/d SBT + 10mg/d D.
